# Supplementary material for: Long-Term Interleukin-6 Levels and Subsequent Risk of Coronary Heart Disease: Two New Prospective Studies and a Systematic Review
Source: PLOS journal article supplement (doi:10.1371/journal.pmed.0050078), 2008-04-03
Supplement: S2 (10.1371/journal.pmed.0050078.s002) [file journal.pmed.0050078.s002]

**Table S2. Comparison of levels of risk factors and other characteristics by thirds of baseline IL-6 levels among non-cases in a pooled analysis of the Reykjavik Study and the BRHS**

| Interleukin 6 range for thirds (pg/ml) in controls: | Bottom Third  (0.01 – 1.47) | | Middle Third  (1.48 – 2.49) | | Top Third  (2.50 – 28.10) | |  |  |  |
| --- | --- | --- | --- | --- | --- | --- | --- | --- | --- |
| Variable | n | Mean ± SD  or n (%) | n | Mean ± SD  or n (%) | n | Mean ± SD  or n (%) | Pearson correlation  r (95% CI) a | tb | tc |
| **Log Interleukin 6 (log pg/ml)** | **1412** | **-0.04 ± 0.53** | **1440** | **0.64 ± 0.15** | **1415** | **1.44 ± 0.46** | **-** | **-** | **-** |
| **Questionnaire** |  |  |  |  |  |  |  |  |  |
| Age (years) | 1412 | 52.9 ± 7.8 | 1440 | 54.3 ± 8 | 1415 | 55.9 ± 8.9 | 0.12 (0.10, 0.15) | 8.2*** | 10.1*** |
| Male sex | 1412 | 1050 (74%) | 1440 | 1115 (77%) | 1415 | 1080 (76%) | 0.02 (-0.01, 0.05) | 1.4 | 2.4* |
| Current cigarette/pipe/cigar smoker | 1412 | 519 (37%) | 1440 | 687 (48%) | 1414 | 811 (57%) | 0.16 (0.13, 0.19) | 10.7*** | 12.4*** |
| Current cigarette smoker | 1412 | 307 (22%) | 1439 | 506 (35%) | 1411 | 641 (45%) | 0.20 (0.17, 0.23) | 13.5*** | 8.6*** |
| History of diabetes | 1412 | 14 (1%) | 1440 | 13 (1%) | 1415 | 32 (2%) | 0.04 (0.01, 0.07) | 2.7* | 2.4* |
| **Physical measurements** |  |  |  |  |  |  |  |  |  |
| Height (m) | 1410 | 1.72 ± 0.08 | 1434 | 1.72 ± 0.08 | 1409 | 1.72 ± 0.08 | -0.04 (-0.07, -0.01) | -2.3* | -2.6* |
| Weight (kg) | 1411 | 74.5 ± 12 | 1433 | 76.1 ± 13.1 | 1410 | 75.1 ± 13.9 | 0.01 (-0.02, 0.04) | 0.7 | -2.6* |
| Body mass index (kg/m2) | 1409 | 25.1 ± 3.2 | 1431 | 25.6 ± 3.6 | 1406 | 25.5 ± 4.1 | 0.04 (0.01, 0.07) | 2.4* | 3.6** |
| Systolic blood pressure (mmHg) | 1412 | 139 ± 20 | 1435 | 144 ± 22 | 1407 | 145 ± 22 | 0.09 (0.06, 0.12) | 6.0*** | 5.2*** |
| Diastolic blood pressure (mmHg) | 1412 | 86 ± 11 | 1434 | 88 ± 13 | 1406 | 87 ± 12 | 0.02 (-0.01, 0.05) | 1.1 | 0.7 |
| Forced expiratory volume (L/sec) | 1385 | 3.11 ± 0.86 | 1410 | 3 ± 0.83 | 1381 | 2.77 ± 0.85 | -0.15 (-0.17, -0.12) | -9.5*** | -7.8*** |
| **Blood measurements** |  |  |  |  |  |  |  |  |  |
| ***Lipids and metabolic factors*** |  |  |  |  |  |  |  |  |  |
| Total cholesterol (mmol/L) | 1410 | 6.42 ± 1.1 | 1436 | 6.35 ± 1.07 | 1412 | 6.28 ± 1.12 | -0.06 (-0.09, -0.03) | -3.6** | -3.1* |
| HDL cholesterol (mmol/L)  † | 245 | 1.18 ± 0.25 | 357 | 1.14 ± 0.26 | 343 | 1.14 ± 0.28 | -0.06 (-0.13, 0.00) | -1.9 | -1.5 |
| Log triglycerides (log mmol/L) | 1351 | 0.065 ± 0.494 | 1352 | 0.165 ± 0.504 | 1338 | 0.19 ± 0.512 | 0.09 (0.06, 0.12) | 5.8*** | 4.5*** |
| Log Lipoprotein(a) (log mg/L) | 1412 | -1.17 ± 1.94 | 1439 | -0.88 ± 1.92 | 1412 | -0.98 ± 1.93 | 0.04 (0.01, 0.07) | 2.3* | 3.4** |
| Fasting glucose (mmol/L) | 1404 | 4.66 ± 0.85 | 1432 | 4.82 ± 0.99 | 1403 | 4.84 ± 1.17 | 0.07 (0.04, 0.10) | 4.4*** | 4.6*** |
| Log Insulin (log mU/L) † | 250 | 4.4 ± 0.7 | 360 | 4.4 ± 0.8 | 352 | 4.4 ± 0.8 | -0.01 (-0.08, 0.05) | -0.4 | -0.2 |
| ***Inflammatory markers*** |  |  |  |  |  |  |  |  |  |
| Log C-reactive protein (log mg/L) | 1361 | -0.34 ± 0.94 | 1367 | 0.2 ± 0.95 | 1326 | 0.86 ± 1.16 | 0.43 (0.40, 0.45) | 30.3*** | 27.6*** |
| Log Serum amyloid A protein (log mg/L) † | 211 | 1.78 ± 0.56 | 292 | 1.9 ± 0.59 | 270 | 2.06 ± 0.82 | 0.23 (0.16, 0.30) | 6.6*** | 6.2*** |
| Log Erythrocyte sedimentation rate (log mm/hr) ‡ | 1078 | 1.58 ± 0.93 | 1030 | 1.84 ± 0.9 | 1022 | 2.11 ± 0.98 | 0.24 (0.20, 0.27) | 13.7*** | 14.2*** |
| Leukocyte count (x 10^9/L) † | 243 | 6.6 ± 1.4 | 353 | 7.1 ± 1.7 | 330 | 7.8 ± 1.9 | 0.28 (0.22, 0.34) | 8.9*** | 7.1*** |
| von Willebrand factor (IU/dL) | 1400 | 102 ± 40 | 1435 | 111 ± 42 | 1412 | 123 ± 49 | 0.18 (0.15, 0.20) | 11.6*** | 9.3*** |
| ***Other markers*** |  |  |  |  |  |  |  |  |  |
| Serum creatinine (umol/L) | 1400 | 90.7 ± 70.2 | 1428 | 90.1 ± 15.3 | 1401 | 90.2 ± 19.6 | 0.00 (-0.03, 0.03) | 0.2 | -0.1 |
| Uric acid (umol/L) | 1409 | 302 ± 69 | 1436 | 314 ± 72 | 1412 | 317 ± 76 | 0.08 (0.05, 0.11) | 5.1*** | 5.0*** |
| Hemoglobin (mmol/L)  ‡ | 1157 | 146 ± 13 | 1071 | 146 ± 13 | 1051 | 146 ± 13 | 0.02 (-0.01, 0.05) | 1.2 | 0.8 |
| Hematocrit (%) | 1399 | 43.9 ± 3.4 | 1424 | 44.3 ± 3.3 | 1383 | 44.4 ± 3.6 | 0.05 (0.02, 0.08) | 3.3* | 1.4 |

aPearson correlation coefficient between loge IL-6 on a continuous scale with the characteristic.

b*t*-Statistic from regression of loge IL-6 on the characteristic univariately.

c*t*-Statistic from regression of loge IL-6 on the characteristic adjusted for age, sex, body mass index (BMI), and smoking.

†, Available only in BRHS; ‡,available only in Reykjavik Study.

***, *p* < 0.0001; **, *p* < 0.001; *, *p* < 0.05
